# Supplementary material
Source: MDPI journal article supplement (https://www.mdpi.com/2073-4395/10/4/534)
Supplement: s1 [file s1]

**Table S2.** Qualitative agromorphological traits classes included in the initial collection of 522 accessions and the primary set.

| <b>Trait</b>    | <b>Class</b>      | <b>522 accessions<br/>(%)</b> | <b>Primary set<br/>(%)</b> |
|-----------------|-------------------|-------------------------------|----------------------------|
| Awnedness       | Awnless           | 23.5                          | 29.8                       |
|                 | 1- 3 cm           | 0.8                           | 0.5                        |
|                 | 3-8 cm            | 29.8                          | 49.5                       |
|                 | > 8 cm            | 45.9                          | 20.2                       |
| Awn colour      | Awnless           | 23.6                          | 29.8                       |
|                 | White             | 38.9                          | 32.4                       |
|                 | Black in the base | 13.8                          | 23.4                       |
|                 | Red to brown      | 23.8                          | 14.4                       |
| Spike density   | Lax               | 86.8                          | 85.1                       |
|                 | Intermediate      | 9.9                           | 8.5                        |
|                 | Dense             | 3.1                           | 5.9                        |
|                 | Very dense        | 0.2                           | 0.5                        |
| Glume hairiness | Hairless          | 84.3                          | 85.6                       |
|                 | Low               | 6.3                           | 2.1                        |
|                 | High              | 9.4                           | 12.2                       |
| Glume colour    | White             | 57.0                          | 62.2                       |
|                 | Red to brown      | 37.9                          | 35.6                       |
|                 | Black             | 5.2                           | 2.1                        |
| Seed colour     | White             | 36.9                          | 41.0                       |
|                 | Red               | 63.1                          | 59.0                       |
