# Supplementary material
Source: MDPI journal article supplement (https://www.mdpi.com/2073-4395/10/4/534)
Supplement: s1 [file s1]

**Table S1.** Latitude, longitude and elevation ranges covered by the initial collection of 522 accessions and the primary set.

|                | <b>Latitude</b>   | <b>Longitude</b>    | <b>Elevation (m)</b> |
|----------------|-------------------|---------------------|----------------------|
| 522 accessions | 433310N - 281820N | 0174928W - 0041559E | 10 - 1610            |
| Primary set    | 433310N - 281820N | 0174928W - 0041559E | 10 - 1610            |
