# Supplementary material
Source: MDPI journal article supplement (https://www.mdpi.com/2073-4395/10/4/534)

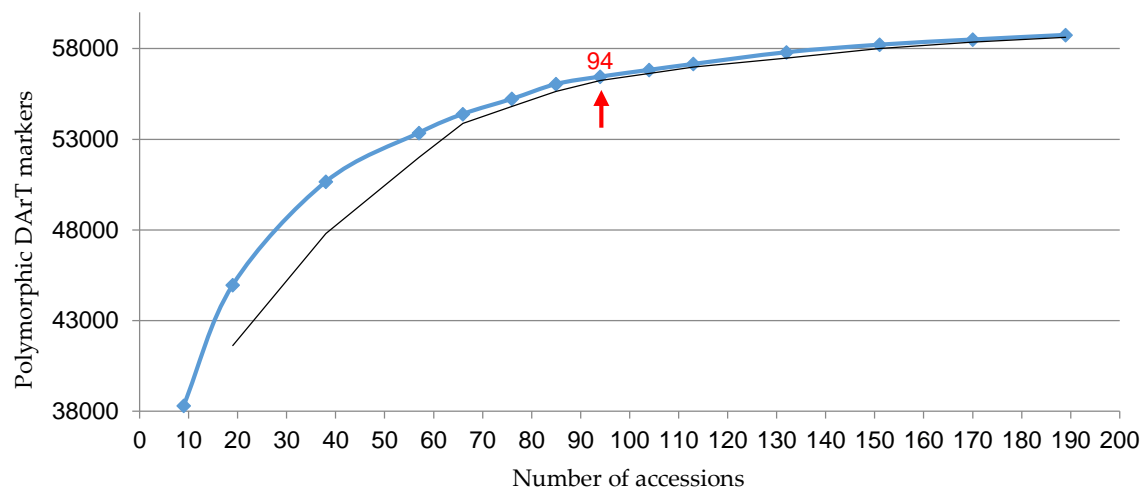

Supplement: s1 [file s1]
